# Supplementary material for: The effect of substituents and molecular aggregation on the room temperature phosphorescence of a twisted π-system
Source: Royal Society of Chemistry journal article supplement (doi:10.1039/d2cp04658j), 2022-12-07
Supplement: d2cp04658j1.pdf [file d2cp04658j1.pdf]

## Electronic Supplementary Information

### The effect of substituents and molecular aggregation on the room temperature phosphorescence of a twisted $\pi$ -system

Cristian A. M. Salla,<sup>1</sup> Giliandro Farias,<sup>2</sup> Ludmilla Sturm,<sup>3</sup> Pierre Dechambenoit,<sup>3</sup> Fabien Durola,<sup>3</sup> Murat Aydemir,<sup>4,5</sup> Bernardo de Souza,<sup>2\*</sup> Harald Bock,<sup>3\*</sup> Andrew P. Monkman,<sup>4\*</sup> Ivan H. Bechtold<sup>1\*</sup>

\*Corresponding authors: [bernadsz@gmail.com](mailto:bernadsz@gmail.com); [harald.bock@crpp.cnrs.fr](mailto:harald.bock@crpp.cnrs.fr);  
[ap.monkman@durham.ac.uk](mailto:ap.monkman@durham.ac.uk); [ivan.bechtold@ufsc.br](mailto:ivan.bechtold@ufsc.br).

<sup>1</sup>Department of Physics, Universidade Federal de Santa Catarina, 88040-900 Florianópolis, SC, Brazil

<sup>2</sup>Department of Chemistry, Universidade Federal de Santa Catarina, 88040-900 Florianópolis, SC, Brazil

<sup>3</sup>Centre de Recherche Paul Pascal, CNRS & Université de Bordeaux, 115, av. Schweitzer, 33600 Pessac, France

<sup>4</sup>Department of Physics, Durham University, South Road, Durham, DH1 3LE, U.K.

<sup>5</sup>Erzurum Technical University, Department of Fundamental Sciences, Erzurum, Turkey

## Table of Contents

|                                                   |   |
|---------------------------------------------------|---|
| <b>Table of Contents</b> .....                    | 2 |
| <b>1. Results and Discussion</b> .....            | 3 |
| 1.1 <i>Single Crystal X-ray Diffraction</i> ..... | 3 |
| 1.2 <i>Photophysical Measurements</i> .....       | 4 |
| 1.3 <i>Theoretical Modeling</i> .....             | 8 |
| <b>References</b> .....                           | 9 |

# 1. Results and discussion

## 1.1 Single crystal x-ray diffraction

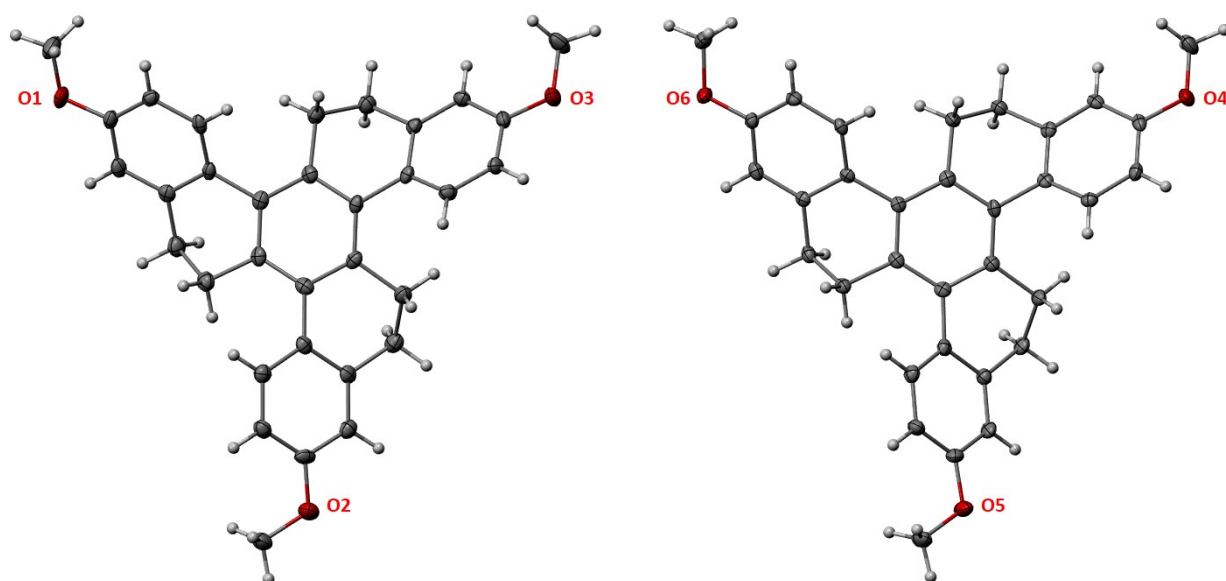

**Figure S1.** ORTEP plot of the molecular structure. ORTEP-type view of the two crystallographically different molecules of **HTX-MeO** at 120 K with thermal ellipsoids for C and O at 50 % probability level, showing the same conformations. C: grey, O: red, H: white.

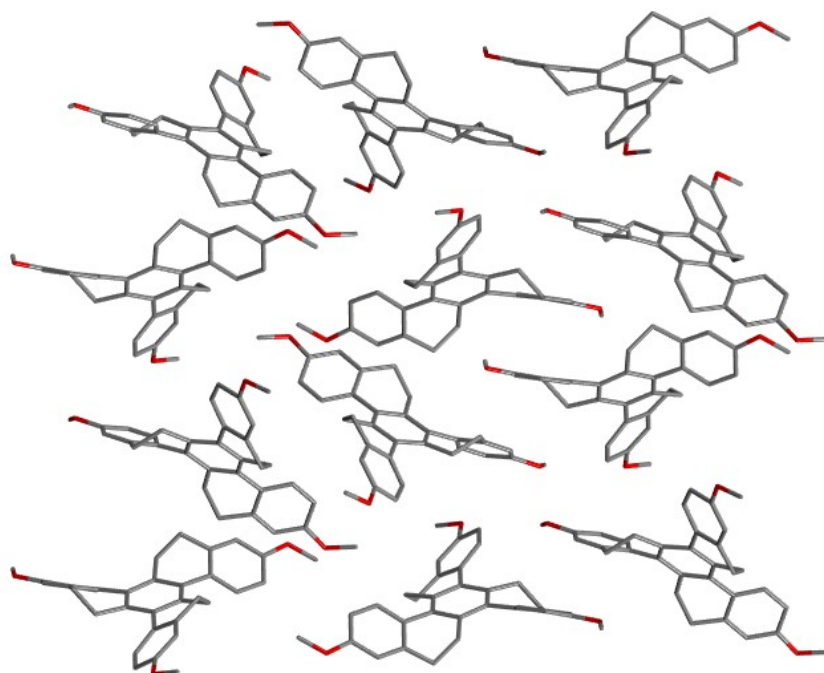

**Figure S2.** Stick representation of the packing along the (ac) plane. C: grey, O: red. Hydrogen atoms are omitted for clarity.

### 1.2 Photophysical measurements

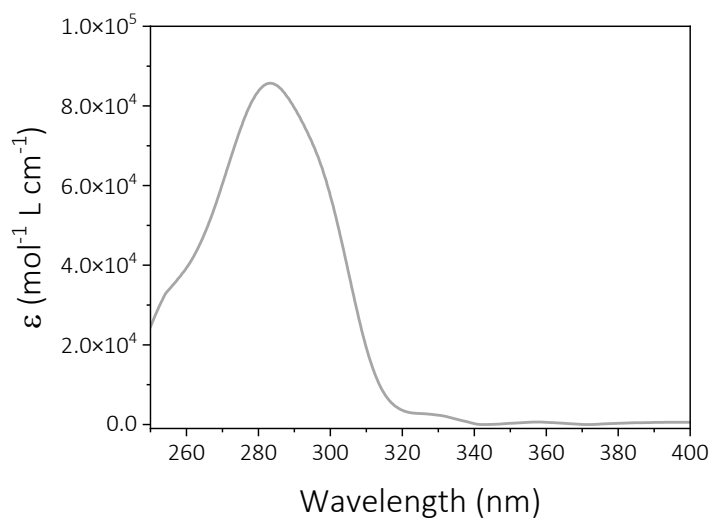

**Figure S3.** Absorption of **HTX-MeO** in dilute chloroform solution ( $10^{-5} \text{ mol L}^{-1}$ ).

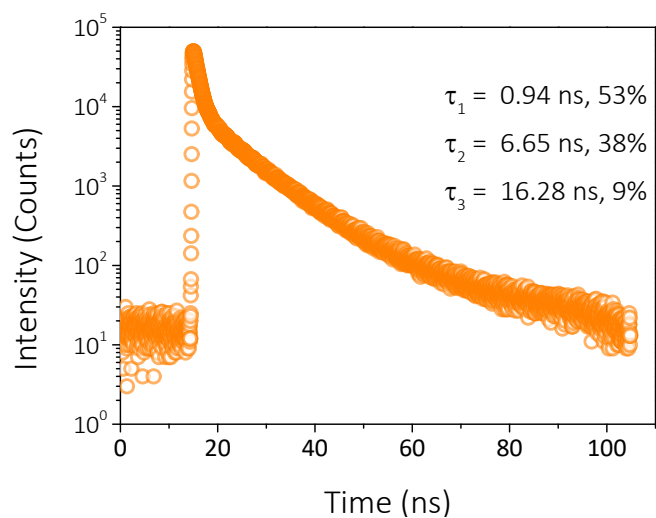

**Figure S4.** Time-correlated single-photon counting emission decay curves of **HTX-MeO** in  $10^{-3} \text{ mol/L}^{-1}$  2-MeTHF solution, collected at 420 nm with excitation at 405 nm.

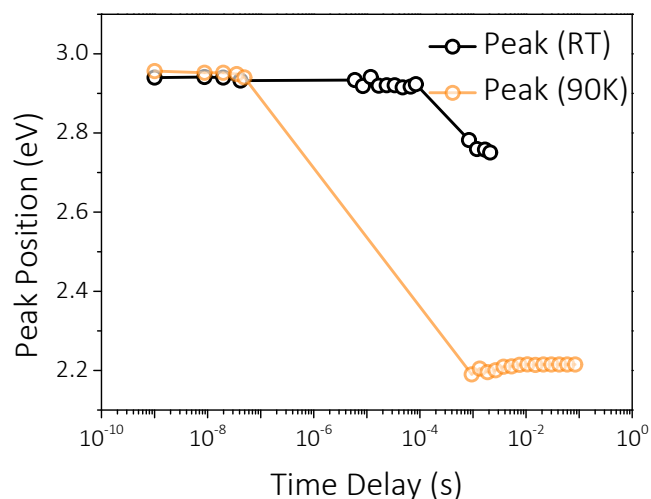

**Figure S5.** Shift of the emission maximum from **HTX-MeO** in  $10^{-3}$  mol/L<sup>-1</sup> 2-MeTHF solution at RT and 90 K.

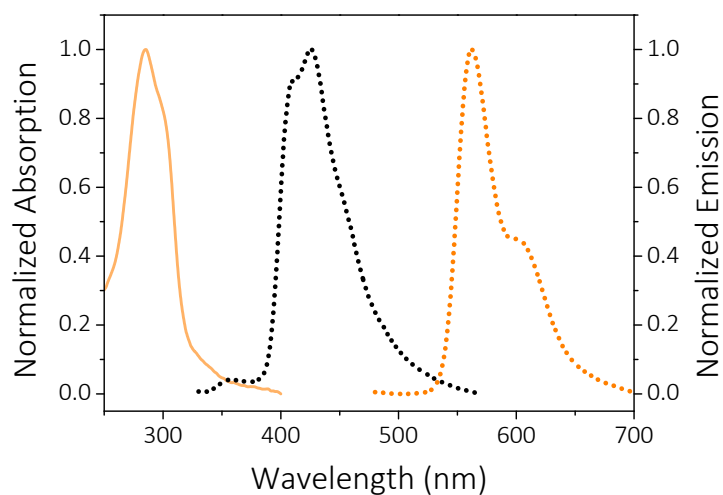

**Figure S6.** Normalized absorption (orange line) and emission spectra (dotted black and light orange line) in undissolved powder of **HTX-MeO** at RT with excitation at 350 nm. The Ph was obtained 10 ms after switching off the excitation at 80 K.

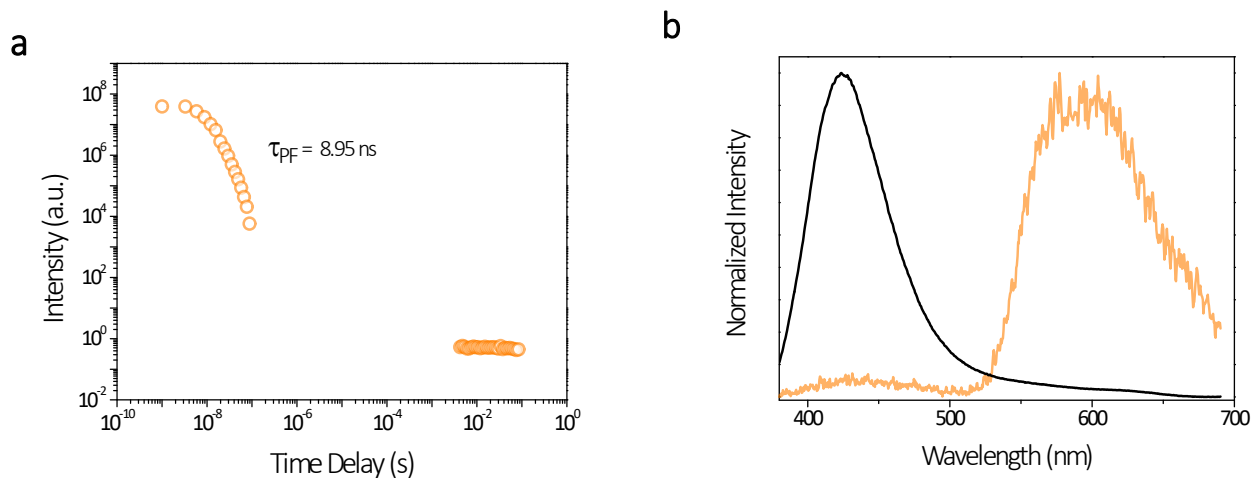

**Figure S7.** Time-resolved measurements of **HTX-MeO** in the powder at RT with excitation at 405 nm. (a) Time-resolved decay. (b) Normalized spectra taken at different TD: TD = 1.1 – 88.3 ns (black line); TD = 4.2 – 84.3 ms (light orange line).

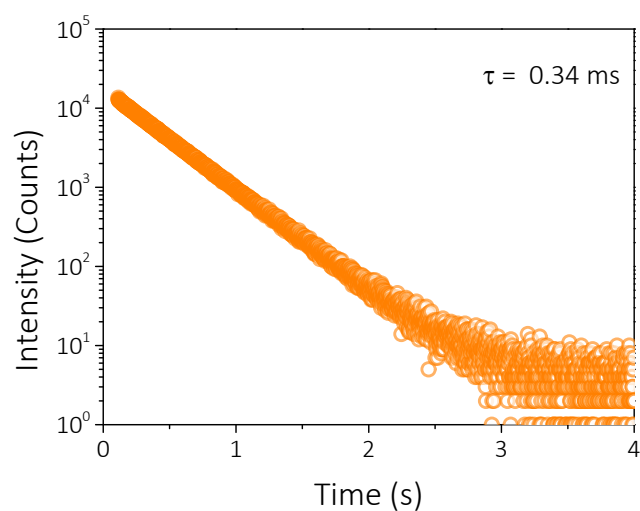

**Figure S8.** Time-correlated single-photon counting emission decay curves of **HTX-MeO** in powder, collected at 570 nm with excitation at 405 nm.

**Table S1.** Photophysical data in 2-MeTHF dilute solution and powder.

|                 |                                                       | HTX <sup>1</sup> | HTX-F <sup>1</sup> | HTX-MeO |
|-----------------|-------------------------------------------------------|------------------|--------------------|---------|
| <i>Solution</i> | $\tau_{PF}$ (ns) <sup>a</sup>                         | 8.19             | 2.60               | 9.15    |
|                 | $\Phi_{PF}$                                           | 0.211            | 0.328              | 0.332   |
|                 | $\tau_{Ph}$ (ms) <sup>b</sup>                         | 498              | 766                | 245     |
|                 | $k_{PF} \times 10^7$ (s <sup>-1</sup> ) <sup>c</sup>  | 2.58             | 12.61              | 3.62    |
|                 | $k_{ISC} \times 10^8$ (s <sup>-1</sup> ) <sup>d</sup> | 0.96             | 2.58               | 7.30    |
|                 | $k_{Ph}$ (s <sup>-1</sup> ) <sup>e</sup>              | 2.01             | 1.30               | 4.08    |
| <i>Powder</i>   | $\tau_{PF}$ (ns) <sup>f</sup>                         | 11.40            | 8.90               | 8.95    |
|                 | $\Phi_{PF}$                                           | 0.410            | 0.197              | 0.434   |
|                 | $\tau_{Ph}$ (ms) <sup>b</sup>                         | 210              | 200                | 390     |
|                 | $\Phi_{Ph}$                                           | 0.062            | 0.033              | 0.047   |
|                 | $k_{PF} \times 10^7$ (s <sup>-1</sup> ) <sup>c</sup>  | 3.60             | 2.21               | 4.89    |
|                 | $k_{ISC} \times 10^7$ (s <sup>-1</sup> ) <sup>d</sup> | 5.18             | 9.02               | 6.32    |
|                 | $k_{Ph}$ (s <sup>-1</sup> ) <sup>g</sup>              | 0.29             | 0.17               | 0.12    |

<sup>a</sup> Obtained from TCSPC measurements at RT and defined as  $\tau = \sum \tau_i^2 A_i / \sum \tau_i A_i$ , for a tri-exponential profile. <sup>b</sup> Obtained from time-resolved measurements at 90 K. <sup>c</sup>  $k_{PF} = \Phi_{PF} / \tau_{PF}$ . <sup>d</sup>  $k_{ISC} = \Phi_{ISC} / \tau_{PF}$ , considering  $\Phi_{ISC} = 1 - \Phi_{PF}$  and assuming, as usual, that the  $\Phi$  for internal conversion is nil,  $\Phi_{IC} = 0$ . <sup>e</sup>  $k_{Ph} \sim \tau_{Ph}^{-1}$ . <sup>f</sup> Obtained from time-resolved measurements at RT. <sup>g</sup>  $k_{Ph} = \Phi_{Ph} / \tau_{Ph}$ . The error of  $\Phi$  was  $\pm 0.004$ .

### 1.3 Theoretical modeling

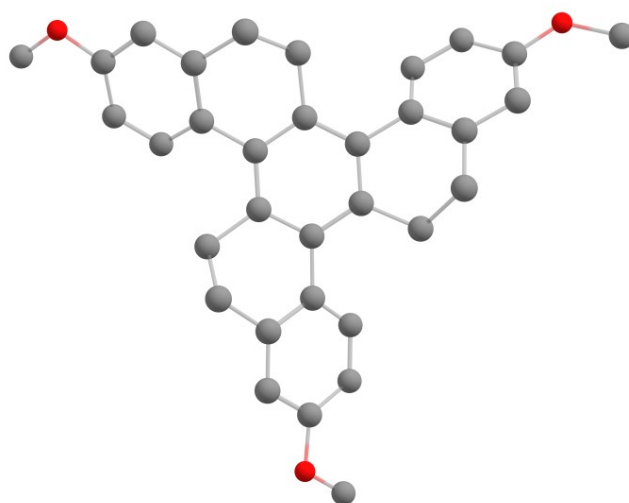

**Figure S9.** Optimized ground state geometry within ZORA-PBE0/def2-TZVP(-f) level of theory. The DFT ground state geometry was compared to the X-ray structure and the maximum average error found was of the order of 1.26% for bond lengths and of 0.24% for bond angles.

**Table S2.** Data for the TD-DFT and SOC-TD-DFT excitations within ZORA-PBE0/def2-TZVP(-f) level of theory for **HTX-MeO** in 2-MeTHF.

| State          | Energy |     | <i>f</i>            | Configuration <sup>a</sup>     |
|----------------|--------|-----|---------------------|--------------------------------|
|                | eV     | nm  |                     |                                |
| S <sub>1</sub> | 4.002  | 310 | 0.00026             | H → L (31)                     |
|                |        |     |                     | H → L+1 (18)                   |
|                |        |     |                     | H-1 → L (18)                   |
|                |        |     |                     | H-1 → L+1 (29)                 |
| S <sub>2</sub> | 4.417  | 281 | 0.67511             | H → L (54)                     |
|                |        |     |                     | H → L+1 (25)                   |
|                |        |     |                     | H-1 → L+1 (13)                 |
| S <sub>3</sub> | 4.434  | 280 | 0.80148             | H → L+1 (12)                   |
|                |        |     |                     | H-1 → L (71)                   |
| S <sub>4</sub> | 4.448  | 279 | 0.50231             | H-1 → L+1 (81)<br>H → L+1 (38) |
| S <sub>5</sub> | 4.706  | 254 | 0.10855             | H-2 → L+1 (28)                 |
|                |        |     |                     | H → L+2 (40)                   |
| T <sub>1</sub> | 3.098  | 400 | >1×10 <sup>-9</sup> | H → L (16)                     |
|                |        |     |                     | H → L+1 (26)                   |



|                |       |     |                      |                |
|----------------|-------|-----|----------------------|----------------|
|                |       |     |                      | H-1 → L (26)   |
|                |       |     |                      | H-1 → L+1 (16) |
|                |       |     |                      | H → L (21)     |
| T <sub>2</sub> | 3.457 | 359 | 1.0×10 <sup>-9</sup> | H → L+1 (16)   |
|                |       |     |                      | H-1 → L (17)   |
|                |       |     |                      | H-1 → L+1 (21) |
|                |       |     |                      | H → L (16)     |
| T <sub>3</sub> | 3.464 | 358 | >1×10 <sup>-9</sup>  | H → L+1 (21)   |
|                |       |     |                      | H-1 → L (21)   |
|                |       |     |                      | H-1 → L+1 (17) |
|                |       |     |                      | H → L (28)     |
| T <sub>4</sub> | 3.862 | 321 | 5.0×10 <sup>-9</sup> | H → L+1 (21)   |
|                |       |     |                      | H-1 → L (15)   |
|                |       |     |                      | H-1 → L+1 (25) |
|                |       |     |                      | H-2 → L (19)   |
| T <sub>5</sub> | 3.926 | 316 | 1.8×10 <sup>-8</sup> | H → L+3 (17)   |
|                |       |     |                      | H-2 → L (10)   |
| T <sub>6</sub> | 3.963 | 313 | 1.5×10 <sup>-8</sup> | H-2 → L+1 (22) |
|                |       |     |                      | H-1 → L+5 (11) |
|                |       |     |                      | H-2 → L+4 (15) |
| T <sub>7</sub> | 4.023 | 308 | 7.0×10 <sup>-9</sup> | H → L+2 (35)   |
|                |       |     |                      | H-2 → L+4 (16) |
| T <sub>8</sub> | 4.072 | 305 | 5.3×10 <sup>-9</sup> | H-1 → L+2 (21) |
|                |       |     |                      | H-1 → L+4 (13) |
|                |       |     |                      | H-2 → L+2 (20) |
| T <sub>9</sub> | 4.088 | 303 | 3.3×10 <sup>-9</sup> | H-1 → L+4 (24) |
|                |       |     |                      | H → L+3 (14)   |
|                |       |     |                      | H → L+5 (11)   |

<sup>a</sup> Transitions with high percentage contributions are shown in parenthesis.

## References

- 1 G. Farias, C. A. M. Salla, M. Aydemir, L. Sturm, P. Dechambenoit, F. Durola, B. de Souza, H. Bock, A. P. Monkman and I. H. Bechtold, *Chem. Sci.*, 2021, **12**, 15116–15127.
